# Supplementary material
Source: HighWire-hosted journal article supplement (https://bmjopen.bmj.com/content/8/6/e019962)
Supplement: inline-supplementary-material-3 [file inline-supplementary-material-3.pdf]

**Supplementary table 3: Consultation**

|                                                                                            | n (%)     | NP         |             |           | PA        |            |    |
|--------------------------------------------------------------------------------------------|-----------|------------|-------------|-----------|-----------|------------|----|
|                                                                                            |           | T0         | T1          | T2        | T0        | T1         | T2 |
| How often is a physician available for consultation when you perform a reserved procedure? |           |            |             |           |           |            |    |
| Seldom                                                                                     | 2 (5.0)   | 6 (5.3)    | 6 (3.6)     | 0 (0.0)   | 3 (4.8)   | 2 (2.1)    |    |
| Sometimes                                                                                  | 1 (2.5)   | 4 (3.5)    | 17 (10.2)   | 2 (8.3)   | 1 (1.6)   | 3 (3.1)    |    |
| Often                                                                                      | 10 (25.0) | 31 (27.2)  | 38 (22.9)   | 8 (33.3)  | 12 (19.0) | 15 (15.6)  |    |
| As needed                                                                                  | 27 (67.5) | 73 (64.0)  | 105 (63.3)  | 14 (58.3) | 47 (74.6) | 76 (79.2)  |    |
| How satisfied are you with the availability?                                               |           |            |             |           |           |            |    |
| Very satisfied                                                                             | 22 (48.9) | 40 (36.0)  | 57 (34.1)   | 14 (58.3) | 34 (54.0) | 57 (57.6)  |    |
| Satisfied                                                                                  | 20 (44.4) | 60 (54.1)  | 96 (57.5)   | 9 (37.5)  | 27 (42.9) | 37 (37.4)  |    |
| Less satisfied                                                                             | 2 (4.4)   | 10 (9.0)   | 9 (5.4)     | 1 (4.2)   | 2 (3.2)   | 3 (3.0)    |    |
| Dissatisfied                                                                               | 1 (2.2)   | 1 (0.9)    | 5 (3.0)     | 0 (0.0)   | 0 (0.0)   | 2 (2.0)    |    |
| Very dissatisfied                                                                          | 0 (0.0)   | 0 (0.0)    | 0 (0.0)     | 0 (0.0)   | 0 (0.0)   | 0 (0.0)    |    |
| How often do you consult a physician on individual patients?                               |           |            |             |           |           |            |    |
| More than 1x/day                                                                           | 5 (11.9)  | 45 (38.5)  | 43 (25.1)*  | 7 (29.2)  | 31 (47.7) | 52 (52.0)  |    |
| 1x/day                                                                                     | 14 (33.3) | 13 (11.1)  | 31 (18.1)*  | 10 (41.7) | 10 (15.4) | 18 (18.0)* |    |
| More than 1x/week                                                                          | 13 (33.3) | 35 (29.9)  | 61 (35.7)   | 3 (12.5)  | 20 (30.8) | 19 (19.0)  |    |
| 1x/week                                                                                    | 9 (21.4)  | 22 (18.8)  | 28 (16.4)   | 2 (8.3)   | 4 (6.2)   | 10 (10.0)  |    |
| 1x/month                                                                                   | 0 (0.0)   | 2 (1.7)    | 8 (4.7)     | 2 (8.3)   | 0 (0.0)   | 1 (1.0)    |    |
| In what form is this consultation? (multiple answers possible)                             |           |            |             |           |           |            |    |
| Face to face                                                                               | 42 (42.4) | 117 (96.7) | 159 (92.4)* | 23 (25.6) | 63 (94.0) | 96 (96.0)* |    |
| By telephone                                                                               | 23 (23.1) | 75 (62.0)  | 104 (60.5)* | 15 (16.7) | 40 (59.7) | 56 (56.0)* |    |
| By e-mail                                                                                  | 17 (17.2) | 53 (43.8)  | 66 (38.4)*  | 6 (6.7)   | 14 (20.9) | 22 (21.8)* |    |
| Do you think the available time for consultation is sufficient?                            |           |            |             |           |           |            |    |
| Yes                                                                                        | 40 (93.0) | 111 (91.7) | 152 (91.0)  | 24 (92.3) | 64 (97.0) | 99 (98.0)  |    |
| No                                                                                         | 3 (7.0)   | 10 (8.3)   | 15 (9.0)    | 2 (7.7)   | 2 (3.0)   | 2 (2.0)    |    |

\* statistically significant difference between T0-T2 (X2 (1) p<0,05)
